# Supplementary material for: Enhanced plasma-catalytic decomposition of toluene over Co–Ce binary metal oxide catalysts with high energy efficiency
Source: Royal Society of Chemistry journal article supplement (doi:10.1039/c9ra00794f), 2019-01-01
Supplement: c9ra00794f1.pdf [file c9ra00794f1.pdf]

## **Supplementary Information**

### **Enhanced plasma-catalytic decomposition of toluene over Co-Ce binary metal oxide catalysts with high energy efficiency**

Zheng Bo, Jinhui Zhu, Shiling Yang, Huachao Yang\*, Jianhua Yan and Kefa Cen

State Key Laboratory of Clean Energy Utilization, Institute for Thermal Power Engineering, College of Energy Engineering, Zhejiang University, Hangzhou, Zhejiang Province 310027, China

Correspondence should be addressed to Huachao Yang (Email: huachao@zju.edu.cn; Tel: 86 571 87953290)

**Table S1.** An overview on the decomposition of toluene with various catalysts in IPC<sup>1</sup>.

| Catalysts                                                                   | m (g) <sub>2</sub> | Q (L min <sup>-1</sup> ) | GHSV (mL g <sup>-1</sup> h <sup>-1</sup> ) <sup>3</sup> | c <sub>in</sub> (ppm) | SIE (J L <sup>-1</sup> ) | η <sub>toluene</sub> (%) | S <sub>CO<sub>2</sub></sub> (%)<br>Bc (%) | η <sub>energy</sub> (g kWh <sup>-1</sup> ) | Ref              |
|-----------------------------------------------------------------------------|--------------------|--------------------------|---------------------------------------------------------|-----------------------|--------------------------|--------------------------|-------------------------------------------|--------------------------------------------|------------------|
| Co <sub>3</sub> O <sub>4</sub> /Al <sub>2</sub> O <sub>3</sub> /nickel foam | -                  | 0.1                      | -                                                       | 50                    | 500                      | 96                       | ~72<br>-                                  | 1.32                                       | 1                |
| MnO <sub>x</sub> /alumina/nickel foam                                       | -                  | 0.1                      | -                                                       | 50                    | 756                      | 95.9                     | 81<br>-                                   | 0.88                                       | 2                |
| MnO <sub>x</sub> /γ-Al <sub>2</sub> O <sub>3</sub>                          | -                  | 2                        | -                                                       | 186                   | 700                      | 96                       | -                                         | 3.52                                       | 3                |
| TiO <sub>2</sub> /γ-Al <sub>2</sub> O <sub>3</sub> /nikel foam              | -                  | 0.2                      | -                                                       | 50                    | 1527                     | 94                       | 99<br>-                                   | 0.42                                       | 4                |
| Cu/OMS-2                                                                    | 0.2                | 0.06                     | 18000                                                   | 800                   | -                        | 80                       | -                                         | -                                          | 5                |
| MnO <sub>x</sub> / Al <sub>2</sub> O <sub>3</sub> /nickel foam              | 0.45               | 0.2                      | 26666.67                                                | 100                   | 651                      | 87                       | 37<br>48                                  | 1.84                                       | 6                |
| Ag/Mn-SBA-15                                                                | 0.2                | 0.1                      | 30000                                                   | 21                    | 317                      | 88                       | -<br>36                                   | 0.80                                       | 7                |
| Co-MCM-41                                                                   | 0.1                | 0.2                      | 120000                                                  | 100                   | 226                      | ~100                     | -<br>75%                                  | 6.11                                       | 8                |
| CeO <sub>2</sub> -MnO <sub>x</sub>                                          | -                  | 0.25                     | -                                                       | 1500                  | 24 W                     | 95.94                    | 90.73<br>-                                | 3.45                                       | 9                |
| MnO <sub>x</sub> -MCM41                                                     | 0.5                | 1                        | 120000                                                  | 110                   | 500                      | 99.4                     | 73<br>99.5%                               | 3.02                                       | 10               |
| <b>Co-Ce</b>                                                                | <b>0.2</b>         | <b>0.5</b>               | <b>150000</b>                                           | <b>210</b>            | <b>401</b>               | <b>98.5</b>              | <b>87.3</b><br><b>97.8</b>                | <b>7.12</b>                                | <b>This work</b> |

<sup>1</sup> Conditions: room temperature; atmospheric pressure; IPC; DBD reactor.

<sup>2</sup> m: catalyst mass.

<sup>3</sup> GHSV: gas hourly space velocity.  $\text{GHSV (mL g}^{-1} \text{ h}^{-1}) = 60000 \times Q / m$ .

**Table S2.** Physicochemical properties of Co-Ce catalysts.

| Sample                                                    | Crystallite size (nm) <sup>1</sup> | Specific surface area (m <sup>2</sup> g <sup>-1</sup> ) | Total pore volume (cm <sup>3</sup> g <sup>-1</sup> ) | Average pore size (nm) |
|-----------------------------------------------------------|------------------------------------|---------------------------------------------------------|------------------------------------------------------|------------------------|
| CoO <sub>x</sub>                                          | -                                  | 12.1                                                    | 0.048                                                | 18.1                   |
| Co <sub>0.75</sub> Ce <sub>0.25</sub> O <sub>x</sub>      | 9.6                                | 56.0                                                    | 0.138                                                | 4.7                    |
| Co <sub>0.5</sub> Ce <sub>0.5</sub> O <sub>x</sub>        | 11.9                               | 51.1                                                    | 0.108                                                | 6.7                    |
| Co <sub>0.25</sub> Ce <sub>0.75</sub> O <sub>x</sub>      | 12.6                               | 46.0                                                    | 0.124                                                | 5.2                    |
| CeO <sub>x</sub>                                          | 14.2                               | 25.6                                                    | 0.077                                                | 7.3                    |
| used Co <sub>0.75</sub> Ce <sub>0.25</sub> O <sub>x</sub> | 10.7                               | 53.7                                                    | 0.131                                                | 5.1                    |

<sup>1</sup> The crystallite size is calculated from the characteristic peak of CeO<sub>2</sub> (111) crystal face located at  $2\theta = 28.7^\circ$ .

**Table S3.** XPS analysis of Co-Ce binary metal oxide catalysts.

| Sample                                                    | Ce <sup>3+</sup> / (Ce <sup>3+</sup> + Ce <sup>4+</sup> ) | O <sub>s</sub> / (O <sub>s</sub> + O <sub>i</sub> ) |
|-----------------------------------------------------------|-----------------------------------------------------------|-----------------------------------------------------|
| Co <sub>0.75</sub> Ce <sub>0.25</sub> O <sub>x</sub>      | 19.2%                                                     | 31.0%                                               |
| Co <sub>0.5</sub> Ce <sub>0.5</sub> O <sub>x</sub>        | 16.2%                                                     | 26.9%                                               |
| Co <sub>0.25</sub> Ce <sub>0.75</sub> O <sub>x</sub>      | 12.7%                                                     | 20.6%                                               |
| used Co <sub>0.75</sub> Ce <sub>0.25</sub> O <sub>x</sub> | 17.6%                                                     | 29.1%                                               |

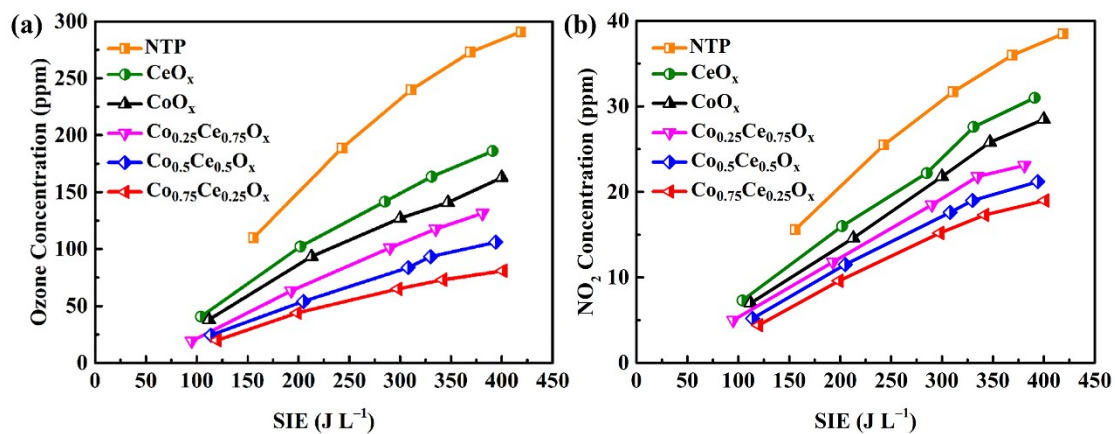

Fig. S1 (a) O<sub>3</sub> and (b) NO<sub>2</sub> concentrations of Co-Ce catalysts as a function of SIE.

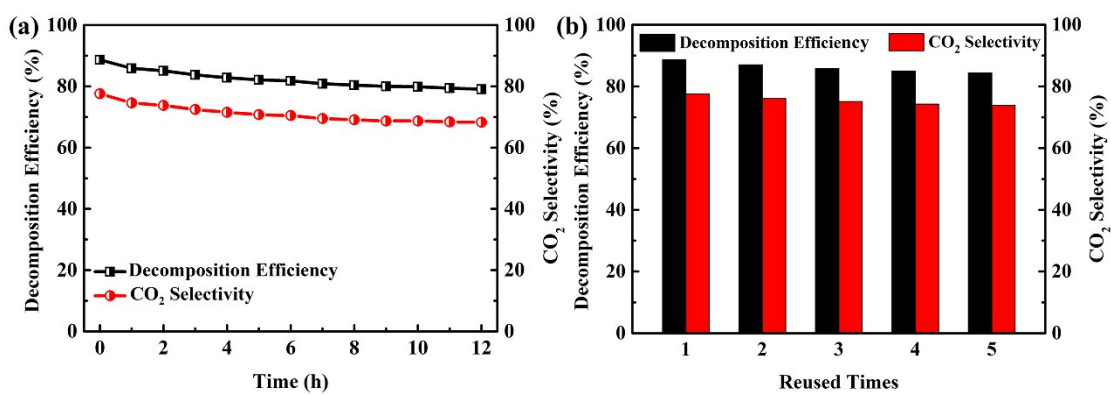

Fig. S2 (a) The durability and (b) reusability tests of the Co<sub>0.75</sub>Ce<sub>0.25</sub>O<sub>x</sub> catalyst at 298 J L<sup>-1</sup>.

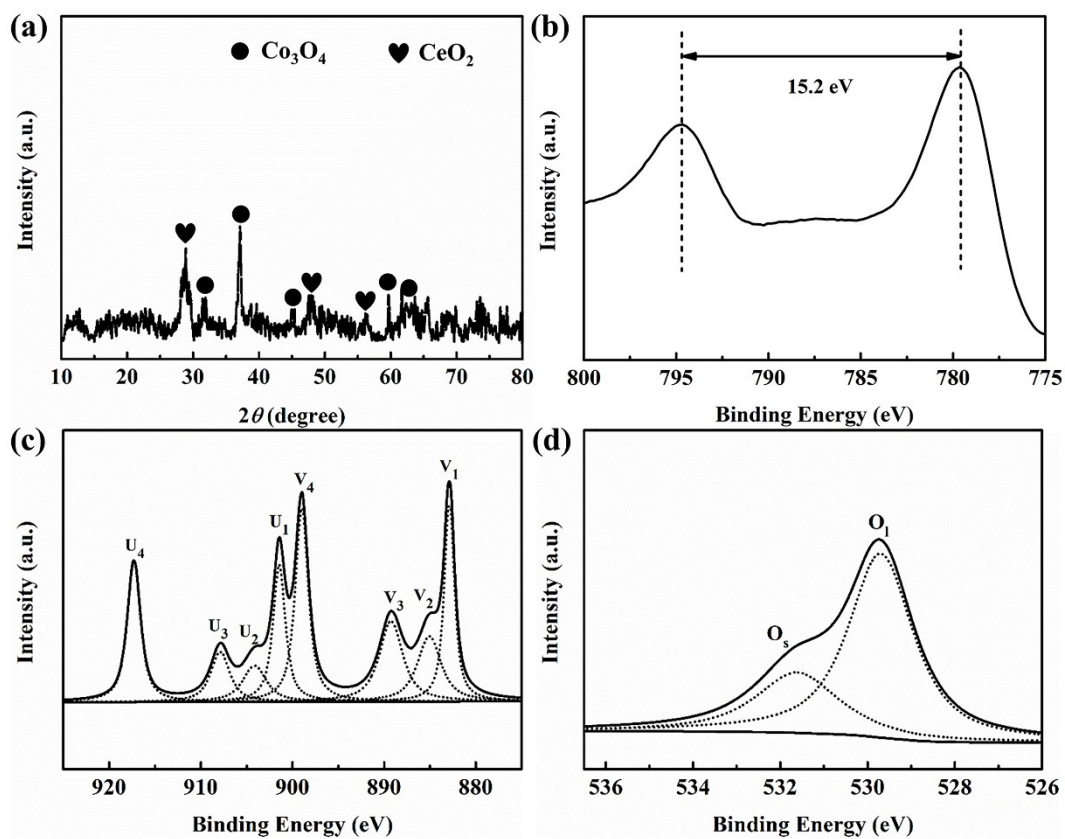

**Fig. S3** (a) XRD and (b-d) XPS characterization of the used  $\text{Co}_{0.75}\text{Ce}_{0.25}\text{O}_x$  catalyst.

## References

- 1 Y. F. Guo, D. Q. Ye and K. F. Chen, *Plasma Chem. Plasma Process.*, 2006, **26**, 237-249.
- 2 Y. F. Guo, D. Q. Ye, K. F. Chen, J. C. He and W. L. Chen, *J. Mol. Catal. A: Chem.*, 2006, **245**, 93-100.
- 3 T. Zhu, J. Li, W. Liang and Y. Jin, *J. Hazard. Mater.*, 2009, **165**, 1258-1260.
- 4 H. B. Huang, D. Q. Ye, D. Y. C. Leung, F. D. Feng and X. J. Guan, *J. Mol. Catal. A: Chem.*, 2011, **336**, 87-93.
- 5 H. T. Quoc An, T. Pham Huu, T. Le Van, J. M. Cormier and A. Khacef, *Catal. Today*, 2011, **176**, 474-477.
- 6 H. B. Huang, D. Q. Ye and D. Y. C. Leung, *IEEE Trans. Plasma Sci.*, 2011, **39**, 576-580.
- 7 X. X. Xu, P. T. Wang, W. C. Xu, J. L. Wu, L. M. Chen, M. L. Fu and D. Q. Ye, *Chem. Eng. J.*, 2016, **283**, 276-284.
- 8 X. X. Xu, J. L. Wu, W. C. Xu, M. L. He, M. L. Fu, L. M. Chen, A. M. Zhu and D. Q. Ye, *Catal. Today*, 2017, **281**, 527-533.
- 9 B. W. Wang, C. M. Chi, M. Xu, C. Wang and D. Meng, *Chem. Eng. J.*, 2017, **322**, 679-692.
- 10 X. Yao, J. Zhang, X. Liang and C. Long, *Chemosphere*, 2018, **208**, 922-930.
